# Supplementary material for: High-Resolution Mapping of Paddy Rice Extent and Growth Stages across Peninsular Malaysia Using a Fusion of Sentinel-1 and 2 Time Series Data in Google Earth Engine
Source: MDPI journal article supplement (doi:10.3390/rs14081875), 2022-04-13
Supplement: s1 [file s1]

## Article

# High-Resolution Mapping of Paddy Rice Extent and Growth Stages across Peninsular Malaysia Using a Fusion of Sentinel-1 and 2 Time Series Data in Google Earth Engine

Fatchurrachman <sup>1</sup>, Rudiyanto <sup>1,\*</sup>, Norhidayah Che Soh <sup>1</sup>, Ramisah Mohd Shah <sup>1</sup>, Sunny Goh Eng Giap <sup>2</sup>, Budi Indra Setiawan <sup>3</sup> and Budiman Minasny <sup>4</sup>

<sup>1</sup> Program of Crop Science, Faculty of Fisheries and Food Science, Universiti Malaysia Terengganu, Kuala Nerus 21030, Terengganu, Malaysia; p4831@pps.umt.edu.my (F.); norhidayah.soh@umt.edu.my (N.C.S.); ramisah@umt.edu.my (R.M.S.)

<sup>2</sup> Program of Environmental Technology, Faculty of Ocean Engineering Technology and Informatics, Universiti Malaysia Terengganu, Kuala Nerus 21030, Terengganu, Malaysia; sunnyg@umt.edu.my

<sup>3</sup> Department of Civil and Environmental Engineering, IPB University, Bogor 16680, Indonesia; budindra@apps.ipb.ac.id

<sup>4</sup> School of Life and Environmental Sciences, Sydney Institute of Agriculture, The University of Sydney, Sydney, NSW 2006, Australia; budiman.minasny@sydney.edu.au

\* Correspondence: rudiyanto@umt.edu.my

## Supplementary Materials

**Citation:** Fatchurrachman; Rudiyanto; Soh, N.C.; Shah, R.M.; Goh, E.G.; Setiawan, B.I.; Minasny, B. High-Resolution Mapping of Paddy Rice Extent and Growth Stages across Peninsular Malaysia Using a Fusion of Sentinel-1 and 2 Time Series Data in Google Earth Engine. *Remote Sens.* **2022**, *14*, 1875. <https://doi.org/10.3390/rs14081875>

Academic Editor: Clement Atzberger

Received: 16 February 2022

Accepted: 11 April 2022

Published: 13 April 2022

**Publisher's Note:** MDPI stays neutral with regard to jurisdictional claims in published maps and institutional affiliations.

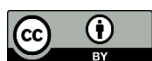

**Copyright:** © 2022 by the authors. Licensee MDPI, Basel, Switzerland. This article is an open access article distributed under the terms and conditions of the Creative Commons Attribution (CC BY) license (<https://creativecommons.org/licenses/by/4.0/>).

**Table S1.** Growth stages from generalized phenological parameters for rice clusters in rice fields in the Peninsular Malaysia, Malaysia. Table S1 corresponds to Figures 5–7 and Table 4. T = Tillage, V = Vegetative-1, V2 = Vegetative-2, R = reproductive, M = Maturity, F (blank) = Fallow. Orange colour is main season and green colour is off season.

| No | Map Unit        | Cluster | Code Name | Area (ha) | 2019 |     |     |     |     |     |     |      |     |     |     |     | 2020 |     |     |     |     |     |     |      |     |     |     |     |    |    |    |  |
|----|-----------------|---------|-----------|-----------|------|-----|-----|-----|-----|-----|-----|------|-----|-----|-----|-----|------|-----|-----|-----|-----|-----|-----|------|-----|-----|-----|-----|----|----|----|--|
|    |                 |         |           |           | Jan  | Feb | Mar | Apr | May | Jun | Jul | Agst | Sep | Oct | Nov | Des | Jan  | Feb | Mar | Apr | May | Jun | Jul | Agst | Sep | Oct | Nov | Des |    |    |    |  |
| 1  | Selangor        | 1       | Sel-1     | 4,445     |      | T   | V   | R   | M   |     |     |      | T   | V   | R   | M   |      |     | T   | V   | R   | M   |     |      | T   | V   | R   | M   |    |    |    |  |
| 2  | Selangor        | 2       | Sel-2     | 2,391     | T    | V   | R   | M   |     |     |     | T    | V   | R   | M   |     |      |     | T   | V   | R   | M   |     |      | T   | V   | R   | M   |    |    |    |  |
| 3  | Selangor        | 3       | Sel-3     | 6,053     | M    |     |     | T   | V   | R   | M   |      |     |     | T   | V   | R    | M   |     |     | T   | V   | R   | M    |     |     | T   | V   | R  |    |    |  |
| 4  | Selangor        | 4       | Sel-4     | 5,493     |      |     | T   | V   | R   | M   |     |      |     | T   | V   | R   | M    |     |     | T   | V   | R   | M   |      |     | T   | V   | R   | M  |    |    |  |
| 5  | Perlis          | 1       | Prl-1     | 21,017    | R    | M   |     |     | T   | V   | R   | M    |     |     | T   | V   | R    | M   |     |     | T   | V   | R   | M    |     |     | T   | V   | V2 |    |    |  |
| 6  | Langkawi        | 1       | Lan-1     | 913       | R    | M   |     |     | T   | V   | R   | M    |     |     | T   | V   | R    | M   |     |     | T   | V   | R   | M    |     |     | T   | V   |    |    |    |  |
| 7  | Negeri Sembilan | 1       | Nes-1     | 179       |      |     | T   | V   | R   | M   | T   | V1   | V2  | R   | M   |     |      | T   | V1  | V2  | R   | M   |     |      | T   | V   | R   | M   |    |    |    |  |
| 8  | Negeri Sembilan | 2       | Nes-2     | 124       |      |     |     | T   | V1  | V2  | R   | M    |     |     | T   | V1  | V2   | R   | M   |     |     |     |     |      |     |     |     |     |    |    |    |  |
| 9  | Negeri Sembilan | 4       | Nes-3     | 143       |      |     |     | T   | V   | R   | M   |      |     |     |     |     |      | T   | V1  | V2  | R   | M   |     |      | T   | V   | R   | M   |    |    |    |  |
| 10 | Johor           | 1       | Joh-1     | 477       | R    | M   |     |     | T   | V   | R   | M    |     |     |     | T   | V    | R   | M   | T   | V1  | V2  | R   | M    | T   | V   | R   | M   |    |    |    |  |
| 11 | Johor           | 2       | Joh-2     | 317       |      |     |     | T   | V1  | V2  | R   | M    |     |     |     |     |      | T   | V1  | V2  | R   | M   |     |      | T   | V   | R   | M   |    |    |    |  |
| 12 | Johor           | 3       | Joh-3     | 288       | T    | V1  | V2  | R   | M   |     |     | T    | V   | R   | M   |     |      |     | T   | V1  | V2  | R   | M   |      |     | T   | V1  | V2  | R  | M  |    |  |
| 13 | Johor           | 4       | Joh-4     | 287       |      |     |     | T   | V   | R   | M   |      |     |     |     | T   | V1   | V2  | R   | M   | T   | V   | R   | M    |     |     |     |     |    |    |    |  |
| 14 | Pahang          | 1       | Pah-1     | 1,000     |      | T   | V1  | V2  | R   | M   |     |      |     |     |     |     |      |     | T   | V   | R   | M   |     |      |     |     |     |     |    |    |    |  |
| 15 | Pahang          | 1       | Pah-2     | 1,408     | R    | M   |     |     | T   | V1  | V2  | R    | M   |     |     | T   | V1   | V2  | R   | M   |     |     | T   | V1   | V2  | R   | M   |     | T  | V  |    |  |
| 16 | Pahang          | 2       | Pah-3     | 450       | T    | V1  | V2  | R   | M   |     |     | T    | V   | R   | M   |     |      |     | T   | V   | R   | M   |     |      | T   | V   | R   | M   |    |    |    |  |
| 17 | Pahang          | 3       | Pah-4     | 491       |      |     |     |     |     |     |     |      |     |     |     |     |      | T   | V   | R   | M   |     |     |      | T   | V   | R   | M   |    |    |    |  |
| 18 | Kedah           | 1       | Ked-1     | 50,000    | R    | M   |     |     |     | T   | V   | R    | M   |     |     | T   | V    | R   | M   |     |     | T   | V   | R    | M   |     |     | T   | V1 | V2 |    |  |
| 19 | Kedah           | 2       | Ked-2     | 54,782    | R    | M   |     |     |     | T   | V   | R    | M   |     |     | T   | V    | R   | M   |     |     | T   | V1  | V2   | R   | M   |     |     | T  | V1 | V2 |  |
| 20 | Penang          | 1       | Pen-1     | 1,206     |      |     | T   | V   | R   | M   |     |      |     | T   | V   | R   | M    |     |     | T   | V   | R   | M   |      |     | T   | V   | R   | M  |    |    |  |
| 21 | Penang          | 2       | Pen-2     | 9,795     | R    | M   |     |     |     | T   | V   | R    | M   |     |     |     | T    | V   | R   | M   |     |     | T   | V    | R   | M   |     |     | T  | V  |    |  |
| 22 | Malacca         | 1       | Mal-1     | 452       | R    | M   |     |     | T   | V1  | V2  | R    | M   |     |     | T   | V    | R   | M   |     |     | T   | V1  | V2   | R   | M   |     |     | T  | V1 | V2 |  |
| 23 | Malacca         | 2       | Mal-2     | 382       | R    | M   |     |     | T   | V   | R   | M    |     |     | T   | V1  | V2   | R   | M   |     |     | T   | V1  | V2   | R   | M   |     |     |    |    |    |  |
| 24 | Malacca         | 3       | Mal-3     | 226       | R    | M   |     |     | T   | V1  | V2  | R    | M   |     |     |     | T    | V   | R   | M   |     |     | T   | V1   | V2  | R   | M   |     |    | T  | V  |  |
| 25 | Kelantan        | 1       | Kel-1     | 11,672    | T    | V   | R   | M   |     |     |     | T    | V   | R   | M   |     |      |     | T   | V1  | V2  | R   | M   |      |     | T   | V   | R   | M  |    |    |  |
| 26 | Kelantan        | 2       | Kel-2     | 11,969    | T    | V1  | V2  | R   | M   |     |     | T    | V1  | V2  | R   | M   |      |     | T   | V1  | V2  | R   | M   |      |     | T   | V1  | V2  | R  | M  |    |  |
| 27 | Perak           | 1       | Per-1     | 10,591    | M    |     |     | T   | V   | R   | M   |      |     |     | T   | V   | R    | M   |     |     | T   | V1  | V2  | R    | M   |     |     | T   | V  | R  |    |  |
| 28 | Perak           | 2       | Per-2     | 3,189     | M    |     |     | T   | V   | R   | M   |      |     |     | T   | V1  | V2   | R   | M   |     |     | T   | V1  | V2   | R   | M   | T   | V1  | V2 | R  |    |  |
| 29 | Perak           | 3       | Per-3     | 4,528     | R    | M   |     |     |     | T   | V   | R    | M   |     |     |     | T    | V   | R   | M   |     |     | T   | V    | R   | M   |     |     | T  | V  |    |  |
| 30 | Perak           | 4       | Per-4     | 14,901    |      | T   | V1  | V2  | R   | M   |     |      |     | T   | V   | R   | M    |     |     | T   | V   | R   | M   |      |     | T   | V   | R   | M  |    |    |  |
| 31 | Perak           | 5       | Per-5     | 5,434     | T    | V   | R   | M   |     |     |     | T    | V1  | V2  | R   | M   |      |     | T   | V1  | V2  | R   | M   |      |     | T   | V1  | V2  | R  | M  |    |  |
| 32 | Terengganu      | 1       | Ter-1     | 46        |      |     |     | T   | V   | R   | M   |      |     |     |     |     |      | T   | V   | R   | M   |     |     |      |     | T   | V1  | V2  | R  | M  |    |  |
| 33 | Terengganu      | 1       | Ter-2     | 60        |      |     |     | T   | V   | R   | M   |      |     |     |     |     | T    | V   | R   | M   |     |     | T   | V    | R   | M   |     |     |    |    |    |  |
| 34 | Terengganu      | 2       | Ter-3     | 79        | T    | V1  | V2  | R   | M   |     | T   | V1   | V2  | R   | M   |     |      |     | T   | V   | R   | M   |     |      | T   | V1  | V2  | R   | M  |    |    |  |
| 35 | Terengganu      | 4       | Ter-4     | 60        |      |     |     | T   | V1  | V2  | R   | M    |     |     |     |     | T    | V1  | V2  | R   | M   |     |     | T    | V1  | V2  | R   | M   |    |    |    |  |
| 36 | Terengganu      | 5       | Ter-5     | 30        |      |     |     | T   | V   | R   | M   |      |     |     |     | T   | V    | R   | M   |     |     | T   | V1  | V2   | R   | M   |     |     |    |    |    |  |

|                                              |            |   |       |         |   |    |    |    |   |   |   |   |   |   |   |   |   |   |   |
|----------------------------------------------|------------|---|-------|---------|---|----|----|----|---|---|---|---|---|---|---|---|---|---|---|
| 37                                           | Terengganu | 6 | Ter-6 | 151     |   | T  | V1 | V2 | R | M |   |   |   |   | T | V | R | M |   |
| 38                                           | Terengganu | 1 | Ter-7 | 112     |   | T  | V1 | V2 | R | M |   |   |   |   |   |   |   |   |   |
| 39                                           | Terengganu | 2 | Ter-8 | 90      | M | T  | V1 | V2 | R | M |   | T | V | R | M |   | T | V | R |
| 40                                           | Terengganu | 1 | Ter-9 | 5,457   | T | V1 | V2 | R  | M |   | T | V | R | M |   | T | V | R | M |
| Total Rice Field Area in Peninsular Malaysia |            |   |       | 230,688 |   |    |    |    |   |   |   |   |   |   |   |   |   |   |   |
